# Supplementary material for: Manuel Eduardo de Gorostiza, traductor
Source: Springer Nature journal article supplement (doi:10.1186/s12872-017-0580-8), 1999-01-01
Supplement: MOESM1 [file 12358616]

## Concepts targeted by the natural language processing system

| #  | Concept                                            | Definition                                                                                                                                                                                                               | Example                                                                       |
|----|----------------------------------------------------|--------------------------------------------------------------------------------------------------------------------------------------------------------------------------------------------------------------------------|-------------------------------------------------------------------------------|
| 1  | aortic valve mean gradient                         | The difference between the ventricular pressure and the recovered aortic pressure averaged across multiple measurements. [mmHg]                                                                                          | AV PG<br>AV mean grad<br>aortic mean gradient                                 |
| 2  | aortic valve max pressure gradient                 | Max value of the pressure gradient                                                                                                                                                                                       | AV max grad                                                                   |
| 3  | aortic valve orifice area                          | Area of the aortic valve opening measured at systole. [mm <sup>2</sup> ]                                                                                                                                                 | AV area                                                                       |
| 4  | aortic valve regurgitation                         | (aka aortic insufficiency) - a condition when aortic valve does not close tightly. Measured qualitatively [trace, mild, severe..] or on a scale [0..4+]                                                                  | ai 1+<br>ar<br>aortic insufficiency                                           |
| 5  | aortic valve regurgitation peak velocity           | Velocity of the regurgitant jet [m/sec]                                                                                                                                                                                  |                                                                               |
| 6  | aortic valve stenosis                              | Valve disease in which the opening of the aortic valve is narrowed. [mild, severe...]                                                                                                                                    | AS<br>AV stenosis                                                             |
| 7  | e/e prime ratio                                    | The ratio of mitral peak velocity of early filling (E) to early diastolic mitral annular velocity (E') (E/E' ratio). Used to detect left ventricular diastolic dysfunction. Normal value is <8.                          | e:e'<br>e to e prime<br>E/Ea ratio                                            |
| 8  | inter-ventricular septum dimension at end diastole | Inter-ventricular septal wall thickness [mm]                                                                                                                                                                             | ivs ed<br>IVS(ED)<br>IVSd                                                     |
| 9  | left atrium size at end systole                    | diameter of the left atrium measured at the end-systole, when the LA chamber is at its greatest dimension. Normal 28-40 mm [mm]                                                                                          | LA dimension<br>dilated LA<br>left atrium<br>LA dilatation<br>LA chamber size |
| 10 | left ventricular contractility                     | Ability of the heart to contract [normal, reduced]                                                                                                                                                                       | contractility                                                                 |
| 11 | left ventricular dimension at end diastole         | The diameter across a ventricle at the end of diastole. [mm]                                                                                                                                                             | LVEDD<br>LVIDD<br>LVED<br>LVD ed<br>end diastolic lv diameter                 |
| 12 | left ventricular dimension at end systole          | Similar to the end-diastolic dimension, but is measured at the end of systole (after the ventricles have pumped out blood) rather than at the end of diastole. [mm]                                                      | LVESD<br>LV systole                                                           |
| 13 | left ventricular size                              | general description of size of the left ventricle [normal, dilated, enlarged]                                                                                                                                            | LV size<br>dilated left ventricle                                             |
| 14 | left ventricular ejection fraction                 | the percentage of blood pumped out of a heart chamber with each contraction [% , preserved, reduced]<br>Same as LV systolic function or dysfunction [normal, reduced]<br>Same as LV contractility [normal, low, reduced] | LVEF<br>EF<br>systolic dysfunction                                            |

|    |                                                           |                                                                                                                                                                                                                                         |                                                            |
|----|-----------------------------------------------------------|-----------------------------------------------------------------------------------------------------------------------------------------------------------------------------------------------------------------------------------------|------------------------------------------------------------|
| 15 | left ventricular hypertrophy                              | Thickening of the muscle of the left ventricle [mild, severe]                                                                                                                                                                           | LVH<br>LV hypertrophy                                      |
| 16 | left ventricular posterior wall thickness at end diastole | The thickness of the posterior left ventricular wall. [mm]                                                                                                                                                                              | LVPWd<br>post LV wall                                      |
| 17 | mitral valve mean gradient                                | The pressure gradient across the mitral valve in mitral stenosis is determined by measurement of the maximum recorded velocity of the mitral jet at end-. [mmHg]                                                                        | MV PG                                                      |
| 18 | mitral valve orifice area                                 | The normal area of the mitral valve orifice is about 4 to 6 cm <sup>2</sup>                                                                                                                                                             | MVA                                                        |
| 19 | mitral valve regurgitation                                | (aka mitral insufficiency) is defined as the abnormal flow of blood through the mitral valve from the left ventricle to the left atrium during systole. [mild, severe, or scale 0...4]                                                  | MR 2-3+<br>1+ MI<br>trace MI<br>MV insufficiency           |
| 20 | mitral valve regurgitation peak velocity                  | peak mitral regurgitant velocity<br>Mitral Regurgitation jet Vmax<br>[m/s]                                                                                                                                                              | mr jet vel                                                 |
| 21 | mitral valve stenosis                                     | narrowing of the orifice of the mitral valve of the heart. [mild, severe, is present, no evidence of]                                                                                                                                   | MS<br>mitral stenosis                                      |
| 22 | pulmonary artery pressure                                 | (aka PA pressure) is a measure of the blood pressure found in the pulmonary artery, usually measured during systole. Mean pulmonary arterial pressure is normally 9 - 18 mmHg [mmHg, hypertension]                                      | PAP<br>PASP<br>PA systolic pressure                        |
| 23 | right atrial pressure                                     | The pressure in the thoracic vena cava near the right atrium                                                                                                                                                                            | RAP<br>RA pressure                                         |
| 24 | tricuspid valve mean gradient                             | mean diastolic gradient across the tricuspid valve [mmHg]                                                                                                                                                                               | TR mean grad                                               |
| 25 | tricuspid valve orifice area                              | tricuspid valve orifice area (TOA) [mm]                                                                                                                                                                                                 | TR area                                                    |
| 26 | tricuspid valve regurgitation                             | a disorder in which the heart's tricuspid valve does not close properly, causing blood to flow backward (leak) into the right upper heart chamber (atrium) when the right lower heart chamber (ventricle) contracts [trace, mild, 3-4+] | TR<br>TI<br>TV insufficiency                               |
| 27 | tricuspid valve regurgitation peak velocity               | (aka tricuspid regurgitant jet velocity) is measured in order to estimate the right ventricular and pulmonary pressure. [m/s]                                                                                                           | TR jet velocity<br>TR max vel<br>Tricuspid regurgitant vel |
